## RESEARCH ARTICLE

# A unique alkaline pH-regulated and fatty acid-activated tandem pore domain potassium channel (K<sub>2p</sub>) from a marine sponge

Gregory D. Wells<sup>1,\*</sup>, Qiong-Yao Tang<sup>2,\*</sup>, Robert Heler<sup>1</sup>, Gabrielle J. Tompkins-MacDonald<sup>3</sup>, Erica N. Pritchard<sup>1</sup>, Sally P. Leys<sup>3</sup>, Diomedes E. Logothetis<sup>2</sup> and Linda M. Boland<sup>1,†</sup>

<sup>1</sup>University of Richmond, Department of Biology, Richmond, VA 23173, USA, <sup>2</sup>Virginia Commonwealth University School of Medicine, Department of Physiology and Biophysics, Richmond, VA 23298, USA and <sup>3</sup>University of Alberta, Department of Biological Sciences, Edmonton, AB, Canada, T6G 2E9

\*These authors contributed equally to this work

†Author for correspondence (lboland@richmond.edu)

## SUMMARY

A cDNA encoding a potassium channel of the two-pore domain family (K<sub>2p</sub>, KCNK) of leak channels was cloned from the marine sponge *Amphimedon queenslandica*. Phylogenetic analysis indicated that AquK<sub>2p</sub> cannot be placed into any of the established functional groups of mammalian K<sub>2p</sub> channels. We used the *Xenopus* oocyte expression system, a two-electrode voltage clamp and inside-out patch clamp electrophysiology to determine the physiological properties of AquK<sub>2p</sub>. In whole cells, non-inactivating, voltage-independent, outwardly rectifying K<sup>+</sup> currents were generated by external application of micromolar concentrations of arachidonic acid (AA; EC<sub>50</sub> ~30 μmol l<sup>-1</sup>), when applied in an alkaline solution (≥pH8.0). Prior activation of channels facilitated the pH-regulated, AA-dependent activation of AquK<sub>2p</sub> but external pH changes alone did not activate the channels. Unlike certain mammalian fatty-acid-activated K<sub>2p</sub> channels, the sponge K<sub>2p</sub> channel was not activated by temperature and was insensitive to osmotically induced membrane distortion. In inside-out patch recordings, alkalinization of the internal pH (pK<sub>a</sub>8.18) activated the AquK<sub>2p</sub> channels independently of AA and also facilitated activation by internally applied AA. The gating of the sponge K<sub>2p</sub> channel suggests that voltage-independent outward rectification and sensitivity to pH and AA are ancient and fundamental properties of animal K<sub>2p</sub> channels. In addition, the membrane potential of some poriferan cells may be dynamically regulated by pH and AA.

Supplementary material available online at <http://jeb.biologists.org/cgi/content/full/215/14/2435/DC1>

Key words: sponge, Porifera, K<sub>2p</sub>, tandem-pore K<sup>+</sup> channel, arachidonic acid, pH.

Received 27 September 2011; Accepted 27 March 2012

## INTRODUCTION

Tandem pore domain K<sup>+</sup> channels (K<sub>2p</sub>; KCNK) are a family of ion channels involved in the control of background or leak membrane conductances (Bayliss and Barrett, 2008; Enyedi and Czirják, 2010). Background K<sup>+</sup> conductances are a major determinant of resting membrane potential and input resistance, two key components of electrical signaling in animal cells. In mammals, there are 15 K<sub>2p</sub> genes that encode for six subfamilies that group together functionally, based on the mechanisms of channel activation and inhibition (Enyedi and Czirják, 2010). Members of the K<sub>2p</sub> family of channels are regulated in variable ways by diverse chemical, physical and pharmacologic agents, including arachidonic acid (AA), internal and/or external protons, membrane stretch, temperature and anesthetic agents (Bayliss and Barrett, 2008; Dedman et al., 2009). A structural understanding for the distinct mechanisms of activation is still incomplete, although the highly variable C-terminal region is implicated in the regulation of some K<sub>2p</sub> channels by AA, internal pH and mechanical stimuli (Kim et al., 2001b) and specific residues near the channel pore regulate external or internal proton sensitivity in some channels (Rajan et al., 2000; Kim et al., 2001a; Morton et al., 2003; Niemeyer et al., 2007; Sandoz et al., 2009; Niemeyer et al., 2010). A better understanding of the molecular determinants of K<sub>2p</sub> channel activation might be achieved by the isolation of more diverse members of this important family of ion channels.

We report the first identification of a novel K<sub>2p</sub> channel cloned from the marine sponge *Amphimedon queenslandica* (Hooper and Van Soest, 2006) a demosponge from the Great Barrier Reef. Sponges are sessile, aquatic, multicellular animals that lack a nervous system, but display contractions to expel water (Nickel, 2004; Elliott and Leys, 2007). There is limited information available on membrane conductances in sponges (Zocchi et al., 2001; Tompkins-MacDonald et al., 2009), but hexactinellid (glass) sponges are known to coordinate flagellar movement and demonstrate calcium-dependent action potentials (Leys et al., 1999). Studying ion channels in native sponges using fine electrodes is impeded by the complex glycocalyx and high membrane fluidity (Carpaneto et al., 2003) and thus requires an alternative approach such as the cloning and functional expression of ion channels. Because the phylum Porifera may share a common ancestor with all other metazoans (Philippe et al., 2009), insight into the structure and function of ion channels from this unusual animal (*A. queenslandica*) may be a key to understanding the genetic repertoire present at the origin of metazoan evolution. Moreover, an understanding of the activation mechanisms for channels cloned from diverse species can provide comparative data that will be useful in determining structure–function relationships of ion channel proteins and understanding their physiological roles in different organisms.

As shown in this study, a K<sup>+</sup> channel subunit cloned from *A. queenslandica* (AquK<sub>2p</sub>) possesses two pore-forming domains and

four transmembrane segments, features common to all  $K_{2P}$  channels. The deduced amino acid sequence for AquK<sub>2P</sub> fails to classify the channel into a known subfamily of  $K_{2P}$  channels. We find that the sponge channel is activated by AA, a polyunsaturated fatty acid, in an external pH-dependent fashion. The sponge K<sub>2P</sub> channel is also activated by internal alkalization with or without AA but its gating is insensitive to temperature changes as well as membrane stretch. Overall, the conservation in sponge and some mammalian K<sub>2P</sub> channels of voltage-independent outward rectification and sensitivity to pH and AA suggest that these are ancient elements of animal K<sub>2P</sub> channel gating.

## MATERIALS AND METHODS

### Isolation of cDNAs and DNA sequencing

*Amphimedon queenslandica* larvae were procured from Heron Island Reef, Queensland, Australia, and preserved in RNAlater stabilization solution (Qiagen, Valencia, CA, USA). RNA extraction and cDNA preparation and cloning methods have been described previously (Tompkins-MacDonald et al., 2009). The primer pair used for amplification of a predicted full-length K<sub>2P</sub> subunit was based on sequence data in the *A. queenslandica* genome (Srivastava et al., 2010) and was composed of 5'-GGCTCGAGCCACCATGGAGAAA-GAGGTCTGAG-3' (forward) and 5'-GGACAGTTCATCTCT-TCTCTACTTCAG-3' (reverse). After cloning into the PCR-4-TOPO vector (Invitrogen, Carlsbad, CA, USA), the AquK<sub>2P</sub> cDNA was ligated into a pXT7 expression plasmid. To ensure the integrity of the sequence data and that the cDNA was complete, we subjected two clones to complete sequencing of both DNA stands in both directions and obtained identical results. We compared our sequence data with the genomic database for *A. queenslandica* and detected only a single K<sub>2P</sub> channel sequence at contig 13452:297098..298220; the open reading frame was interrupted by a single intron and the coding region of 1059 nucleotides predicted a 353 amino acid peptide. The exon sequences in the genomic database and two cDNA clones were identical except for the codon predicting residue 350. At this position, our results predicted a valine whereas the genomic database predicts a glycine.

### Phylogenetic analysis and alignments

The translated sponge K<sub>2P</sub> sequence was aligned and compared with amino acid sequences of K<sub>2P</sub> (KCNK) sequences obtained from NCBI. Evolutionary analyses were conducted in MEGA5 (Tamura et al., 2011). Alignments were performed in MAFFT (<http://mafft.cbrc.jp/alignment/server/>) using default parameters and viewed in BioEdit version 7.0.5.3 (Ibis Biosciences, Carlsbad, CA, USA). Membrane topology was predicted by the ExPASy TMHMM server v2.0 (Swiss Institute of Bioinformatics, Lausanne, Switzerland) and adjusted by alignment with channels with published topology profiles. Sequence data for AquK<sub>2P</sub> have been deposited in GenBank (accession number JN165777).

### RNA and oocyte preparation and injection

RNA preparation, *Xenopus laevis* oocyte isolation and oocyte injection were carried out using methods previously described in detail (Boland et al., 2009; Tompkins-MacDonald et al., 2009). Animal protocols were approved by the University of Richmond and the Virginia Commonwealth University Institutional Animal Care and Use Committees. Individual oocytes (stages V and VI) were injected with 40–60 nl RNA (0.25–1.0 ng nl<sup>-1</sup>) in RNase-free water. Oocytes were maintained at 17–19°C for 1–5 days in an ND-96 solution containing (in mmol l<sup>-1</sup>): 96 NaCl, 1 KCl, 1 CaCl<sub>2</sub>, 2 MgCl<sub>2</sub>, 10 Hepes, 5 sucrose and 2 Na pyruvate, with 50 U ml<sup>-1</sup>

penicillin G, 50 µg ml<sup>-1</sup> streptomycin and, in most cases, 50 µg ml<sup>-1</sup> tetracycline. Solution pH was adjusted with NaOH to 7.4 using an Orion 310 pH meter (Thermo Fisher Scientific, Pittsburgh, PA, USA).

### Electrophysiology

Two-electrode voltage clamp (TEVC) methods were used to record whole oocyte potassium currents using standard methods (Boland et al., 2009) with a Geneclamp 500B (Molecular Devices, Sunnyvale, CA, USA) or an OC-725C amplifier (Warner Instruments, Hamden, CT, USA). Currents were sampled at 5–10 kHz and filtered at 1–2 kHz. Experiments were performed at room temperature (21–23°C), and a small volume bath chamber was perfused continuously during recordings. Bath temperature was changed by cooling or heating the solution from the reservoir to the recording chamber and was measured with a calibrated digital thermometer containing a small probe that was placed next to the oocyte in the recording chamber. The standard TEVC external recording solution contained (in mmol l<sup>-1</sup>): 2 KCl, 98 NaCl, 2 MgCl<sub>2</sub>, 0.3 CaCl<sub>2</sub> and 5 Hepes with the pH adjusted with NaOH to 6.5–9.0. Solution osmolality was adjusted by adding sucrose or eliminating some of the NaCl and was measured using a Fiske 210 osmometer (Advanced Instruments, Norwood, MA, USA).

For inside-out patch recordings, we used a Dagan 3900A amplifier (Dagan Corporation, Minneapolis, MN, USA). Patch recording pipettes had resistances of approximately 0.5–1.5 Mohm after fire-polishing and were backfilled with a standard extracellular solution that was composed of (in mmol l<sup>-1</sup>): 96 Na methanesulfonate (MES), 2 KMES, 1 MgCl<sub>2</sub>, 1 CaCl<sub>2</sub> and 5 Hepes with the pH adjusted to 7.4 with NaOH. The bath solution (facing the internal surface of the membrane) was composed of (in mmol l<sup>-1</sup>): 96 KMES, 10 Hepes, 5 EGTA and 5 EDTA. The pH of the bath solution for patches was modified with the addition of KOH, which summed to 3 mmol l<sup>-1</sup> K<sup>+</sup> at the highest pH values tested. Inside-out macropatch recordings were obtained at room temperature (20–23°C) with continual perfusion of the internal surface of the membrane patch.

Electrophysiological data were recorded on Pentium computers equipped with Digidata A/D hardware (Molecular Devices). Molecular Device's Clampex and Clampfit analysis software were used. Data were also transferred to Microsoft Excel (Microsoft, Redmond, WA, USA) or Microcal Origin (OriginLab, Northampton, MA, USA) for additional analysis and the production of figures. Results are expressed as means ± s.e.m.; *N* is the number of cells or patches tested. Statistical significance was evaluated by paired or unpaired Student's two-tailed *t*-tests with *P* < 0.05 considered to be significant.

### Reagents

Reagents were purchased from Sigma-Aldrich (St Louis, MO, USA) or Nu-Chek Prep Lipids (Elysian, MN, USA). AA was dissolved in ethanol or DMSO at 1000–3000×, stored at –20°C and diluted into recording solution immediately before use. Vehicle controls were determined to be without effect at the highest concentrations of diluents. Fatty-acid-free bovine serum albumin (BSA) was dissolved into recording solutions at 0.5 mg ml<sup>-1</sup>.

## RESULTS

### AquK<sub>2P</sub> amino acid sequence and homology

AquK<sub>2P</sub> is the first K<sub>2P</sub> (KCNK) channel to be identified from poriferans and the subunit shares the common features of this family of channels: two pore-forming loops (P1 and P2) and four



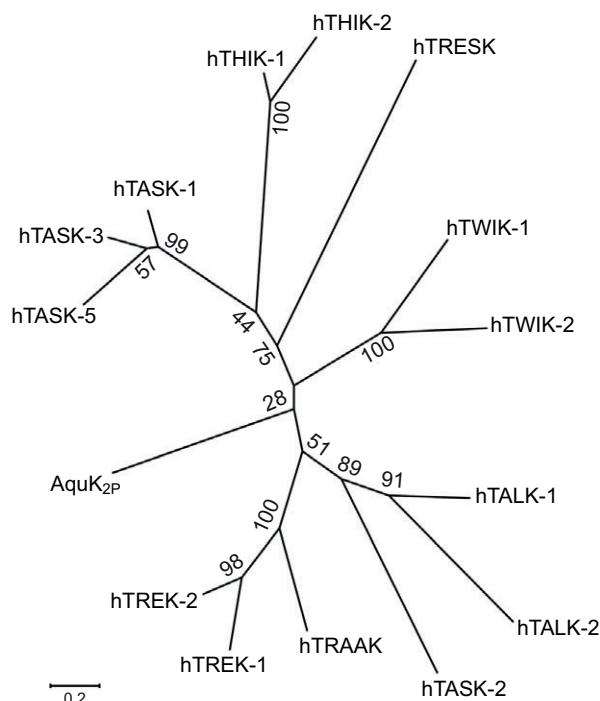

Fig. 2. Phylogenetic analysis of AquK<sub>2P</sub>. An unrooted tree comparing AquK<sub>2P</sub> to human (h) K<sub>2P</sub> channels. The evolutionary history was inferred using the maximum likelihood method (Jones et al., 1992). The tree with the highest log likelihood (−5892.4037) is shown. The tree is drawn to scale, with branch lengths measured in the number of substitutions per site. Scale bar indicates the number of amino acid substitutions per site. Branch numbers represent bootstrap values of 100 replicates. The analysis involved 15 amino acid sequences and a total of 213 positions in the final data set.

#### External mechanisms of AquK<sub>2P</sub> channel activation

Non-inactivating K<sup>+</sup> channel currents were generated by external application of the polyunsaturated fatty acid AA (5,8,11,14-eicosatetraenoic acid) to oocytes injected with RNA prepared from the AquK<sub>2P</sub> cDNA (Fig. 3). We discovered that the activation by AA depended on an external alkaline pH (pH<sub>o</sub>; see Fig. 4); therefore, we studied the AA-dependent current activation and assessed K<sup>+</sup> selectivity using pH<sub>o</sub> 8.5 or 9.0. AquK<sub>2P</sub> currents are largely time independent, but at strong depolarizations they were not instantaneous (Fig. 3A, see top three traces at +20, +40 and +60 mV and 3C, inset). Resolution of the time dependence of activation was better achieved in inside-out patch recordings (supplementary material Fig. S1A). The rapid current activation was best fit by a two-exponential function, but the fitted time constants ( $\tau_1$ ~0.8 ms and  $\tau_2$ ~9 ms) were not voltage or pH dependent (supplementary material Fig. S1B). There was also no saturation of the outward current at strong depolarizations (Fig. 2A, supplementary material Fig. S1A,C).

In TEVC recordings, there was almost no inward current in an external solution containing 2 mmol l<sup>−1</sup> K<sup>+</sup> and 98 mmol l<sup>−1</sup> Na<sup>+</sup> (Fig. 3A,B and 3D, inset) and, even in elevated external K<sup>+</sup>, the currents did not show inward rectification (Fig. 3D, inset). Macropatch recordings in symmetrical K<sup>+</sup> also failed to show significant inward current at pH 6.0 to 8.0; however, at hyperpolarized membrane potentials of −50 to −180 mV and pH 8.5, a small inward current developed (supplementary material Fig. S1B) but the current–voltage curve was still outwardly rectifying. Our

data support the conclusion that AquK<sub>2P</sub> is an outwardly rectifying channel with no apparent voltage dependence to the activation mechanism. Mechanisms of outward rectification have been revealed in some channel types, including the external Mg<sup>2+</sup> block of NMDA receptor channels (Nowak et al., 1984), the differential influx or efflux of cations in TRPM7 channels (Penner and Fleig, 2007) and a mechanism intrinsic to the channel protein in TWIK-1 channels (Lesage et al., 1996).

To study the concentration–response relationship for AquK<sub>2P</sub> current activation by AA, we applied increasingly higher concentrations of AA without recovery in between the concentrations; the dose–response relationship has a fitted EC<sub>50</sub> value of 30.6  $\mu$ mol l<sup>−1</sup> with a Hill coefficient of 4.0 (Fig. 3C). Because there is a sensitization to prior AA applications (see Fig. 4), the steep slope could be explained by increasing levels of sensitization or perhaps a cooperative effect of AA on channel opening. The channels are mainly permeable to K<sup>+</sup> because a plot of the current reversal potential *versus* the log of the K<sup>+</sup> concentration yielded a linear relationship with a slope of 46 mV decade<sup>−1</sup>, which is close to the theoretical value of 58 mV decade<sup>−1</sup> for a K<sup>+</sup> selective channel (Fig. 3D). Even in elevated external K<sup>+</sup>, the currents did not show inward rectification (Fig. 3D, inset). The dose-dependent activation of AquK<sub>2P</sub> by AA (Fig. 3C) did not change the current reversal potential (Fig. 3B).

As noted, the activation of AquK<sub>2P</sub> by AA was regulated by external alkalization (Fig. 4). AquK<sub>2P</sub> currents were always activated by 10–100  $\mu$ mol l<sup>−1</sup> AA when applied in an external recording solution of pH 8.5 or 9.0 and sometimes even at pH 8.0, if the AA was applied for a long duration (>5 min) or if this followed a prior activating event at alkaline pH values. However, only rarely (<5% of cells) were currents detected when up to 200  $\mu$ mol l<sup>−1</sup> AA was applied at an external pH of 7.4. Independent of pH<sub>o</sub>, AquK<sub>2P</sub> current activation was reversed completely by external application of bovine serum albumin (BSA), a fatty acid binding protein, confirming that AA was required for activation (Fig. 4A,B).

A sensitization effect was apparent in all cells tested with external AA and alkaline pH. For example, the representative time course in Fig. 4A shows that AA-dependent current activation at pH<sub>o</sub> 9.0 was enhanced following prior activation at pH<sub>o</sub> 8.5 or 9.0 when compared with the effect of the first application of pH<sub>o</sub> 9.0 to the cell. These changes occurred with complete washout of the pH effects and in the constant presence of AA. We also documented this sensitization using three successive applications of AA at pH<sub>o</sub> 9.0, with interruptions by non-activating applications of AA at pH<sub>o</sub> 7.4. The time course of the response to AA (Fig. 4B) shows that the K<sup>+</sup> current is activated more quickly and the steady-state current amplitude is significantly increased by each successive application of alkaline pH (Fig. 4C), even with complete washout of the effect in between the applications of alkaline pH. The time course and reversibility of these effects argue against a perfusion artifact as an explanation for the sensitization. However, changes in external pH alone (in the range of 6.5 to 9.0) failed to activate any current in AquK<sub>2P</sub>-expressing oocytes (Fig. 4D, N=5). None of the pH<sub>o</sub>-regulated, AA-dependent AquK<sub>2P</sub> currents showed differences in the current reversal potential or rectification in 2 mmol l<sup>−1</sup> external K<sup>+</sup>, even when the currents were sensitized by prior activation, as for the example shown in Fig. 4E. The most important conclusion is that AquK<sub>2P</sub> subunits assemble to make functional K<sup>+</sup> channels whose AA-dependent activation is regulated by external alkaline pH, but AquK<sub>2P</sub> is not activated by external alkalization alone.



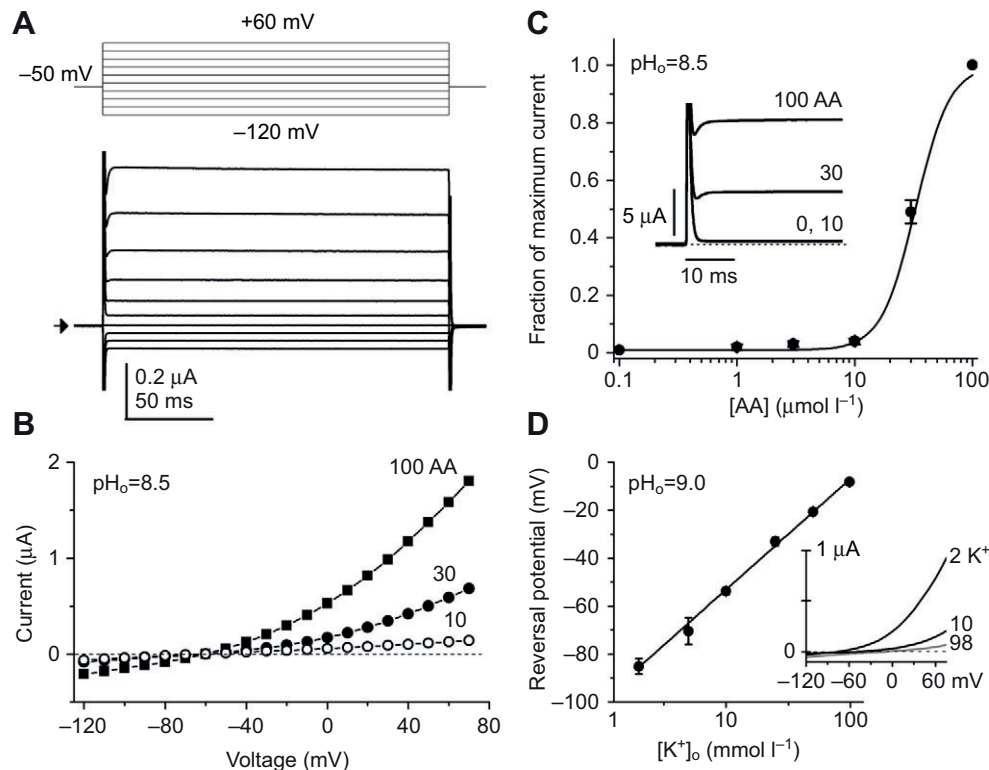

Fig. 3. Biophysical properties of AquK<sub>2P</sub> channels. (A) Two-electrode voltage clamp (TEVC) AquK<sub>2P</sub> currents elicited by external application of 30  $\mu\text{mol l}^{-1}$  arachidonic acid (AA) with the indicated voltage protocol; for clarity, only 20 mV increments are shown although the voltage family in the experiment used 10 mV increments (as plotted in B). The whole oocyte capacitive transients at the onset and offset of the voltage step are truncated in this image. The arrow indicates the zero current level. (B) Current–voltage plots for the AquK<sub>2P</sub> currents elicited by 10, 30 or 100  $\mu\text{mol l}^{-1}$  AA in the same recording as shown in A. Currents were measured at steady-state, at the end of each voltage step. The dashed line indicates the zero current level. (C) Concentration–response data for AA activation of AquK<sub>2P</sub>. Steady-state current amplitudes were measured at +60 mV for a given concentration and were normalized to the current activated by 100  $\mu\text{mol l}^{-1}$  AA in the same cell (means  $\pm$  s.e.m.,  $N=10$ ). The inset shows the first 30 ms of current from a representative cell; the dashed line indicates zero current level and whole oocyte capacitive transients are truncated. Doses were applied in order of increasing concentration for 5 min each. The solid curve is fitted to the normalized data in Origin v.8 using a logistic equation:  $y = [(A_1 - A_2) / (1 + ([AA]/EC_{50})^b)] + A_2$ , where  $A_1$  and  $A_2$  represent the maximum and minimum responses, respectively, and  $b$  is the slope. The fitted  $EC_{50}$  was 30.6  $\mu\text{mol l}^{-1}$  with a fitted slope of 4.0. The external recording solution for A–C contained (in  $\text{mmol l}^{-1}$ ): 2 KCl with 98 NaCl and the pH was adjusted to 8.5 with NaOH. (D) A semi-logarithmic plot of the measured reversal potential (zero current level) of AquK<sub>2P</sub> currents as a function of external  $K^+$  concentration. Cells were tested at  $pH_o 9.0$  with 10  $\mu\text{mol l}^{-1}$  AA and the pH was adjusted with NaOH to avoid changing the  $K^+$  concentration. Data are means  $\pm$  s.e.m. ( $N=3-9$  cells). The solid line is fitted by linear regression to  $y=46.4x-99.5$ . The inset shows current–voltage plots from a representative cell in 2, 10 and 98  $\text{mmol l}^{-1}$   $K^+$ ; the dashed line indicates the zero current level.

#### Internal mechanisms of AquK<sub>2P</sub> channel activation

Using inside-out macropatches, we tested the internal pH ( $pH_i$ ) sensitivity of AquK<sub>2P</sub> in the absence of AA. Fig. 5 shows that the channel is regulated by  $pH_i$  alone. Activity was very low at  $pH_i$  values that are expected in a resting oocyte ( $\sim 7.4$ ) and was enhanced at alkaline  $pH_i$  values. An internal pH of 6.0 largely blocked the current. Although the alkaline-activated currents showed sensitization (see Fig. 6B), the current amplitude eventually reached a plateau level for each  $pH_i$  value (Fig. 5A). The alkaline  $pH_i$ -activated currents were outwardly rectifying in 2  $\text{mmol l}^{-1}$  external  $K^+$  and there was no change in the reversal potential upon activation by  $pH_i$  (Fig. 5B). A concentration–response curve for the  $pH_i$  sensitivity, determined after alkaline  $pH_i$ -activated currents had stabilized and sensitization was no longer apparent, had a  $pK_a$  of  $8.18 \pm 0.05$  (Fig. 5C).

In inside-out patches, AquK<sub>2P</sub> channels were also activated by AA applied directly to the internal surface of the membrane (Fig. 6). The patches were first tested at  $pH 7.4$  to mimic the expected internal pH of the oocyte in the TEVC recordings. The time course of current activation in membrane patches showed a delay upon first application of AA with a much shorter delay upon

reapplication of AA (Fig. 6A). The second application of AA followed a reversal of the AA effect by BSA and then washout of BSA from the chamber.

The onset of activation of AquK<sub>2P</sub> by AA was faster in the membrane patch (Fig. 6A) when compared with the whole cell (Fig. 4A), but the sensitization to a second application of AA was observed both in whole-oocyte recordings with AA applied externally and in excised inside-out patches with AA applied internally. We also tested for sensitization following internal pH-dependent gating in the absence of AA. As shown in Fig. 6B, AquK<sub>2P</sub> channels became activated in a solution of  $pH_i 8.5$  (time point 1 in Fig. 6B) and were then de-activated by the return to  $pH_i 6.0$ . The second and third application of  $pH_i 8.5$  (time points 3 and 4 in Fig. 6B) yielded a faster onset of current and an increase in current amplitude with each application when compared with the first exposure to the alkaline internal solution. The sensitization was not accompanied by any changes in rectification or reversal potential (Fig. 6C). Most cells eventually reached a stable level of activation by alkaline  $pH_i$  and, under these conditions, could then be used for the dose–response relationship already presented in Fig. 5C.

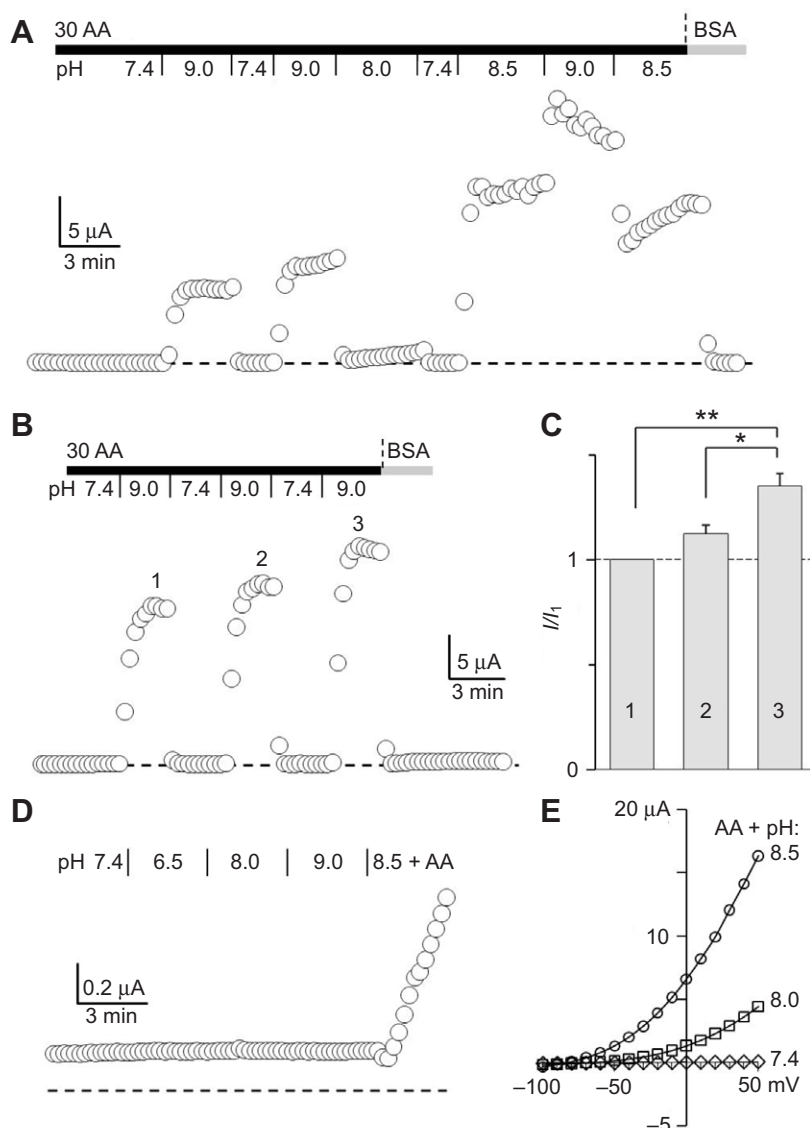

Fig. 4. AquK<sub>2P</sub> channels are activated by externally applied AA. (A,B,D) Representative time courses from TEVC recordings of AquK<sub>2P</sub>-expressing oocytes. Current amplitudes were measured at a step potential of +60 mV from a holding potential of -50 mV; dashed lines indicate the zero current level. (A) External AA (30  $\mu$ mol l<sup>-1</sup>) was applied in recording solutions of the indicated external pH (pH<sub>o</sub>) values. BSA (0.5 mg ml<sup>-1</sup>) at pH<sub>o</sub> 8.5 was used to reverse the AA effect. Note that the recording began in the absence of AA at pH<sub>o</sub> 7.4. (B) Demonstration of a sensitization of the activation by repeated applications of AA in alkaline pH<sub>o</sub>. (C) Composite data showing the current magnitude activated by three successive applications of AA at pH<sub>o</sub> 9.0 (means  $\pm$  s.e.m., *N*=4). The currents for the last two measurements (2,3) were normalized (*I*/*I*<sub>1</sub>) to the steady-state level reached with the first (1) application of AA in each cell. Brackets with asterisks indicate values that are significantly different: \**P*<0.05; \*\**P*<0.01. (D) A representative time course to test the effect of external pH alone on current activation. Note the confirmation of channel expression at the end by application of 30  $\mu$ mol l<sup>-1</sup> AA in a pH<sub>o</sub> 8.5 recording solution. (E) Representative current-voltage plots for 30  $\mu$ mol l<sup>-1</sup> AA-activated currents at three different pH<sub>o</sub> values; this is a different cell than that shown in A–D. Steady-state currents were measured from voltage steps elicited from a holding potential of -50 mV; all recording solutions contained 2 mmol l<sup>-1</sup> external K<sup>+</sup>. In this recording, the order of application was pH<sub>o</sub> 7.4, 8.5 and then 8.0; thus the current elicited at pH<sub>o</sub> 8.0 + AA may represent a sensitized response.

#### Effects of osmotic and thermal stimuli on AquK<sub>2P</sub>

Compared with AA-dependent activation, AquK<sub>2P</sub> channels were relatively insensitive to mechanical forces within the membrane that were induced by osmotic shrinking or swelling of the oocytes (Fig. 7A,B), which we confirmed with a dissecting microscope. The small changes in AquK<sub>2P</sub> current coincident with cell swelling (142 mOsm kg<sup>-1</sup>) or shrinking (400 mOsm kg<sup>-1</sup>) are not significantly different from each other and are only a small fraction of the current amplitude measured after 5 min of AA (Fig. 7A), a time point we selected for quantitation of the results. The same results were obtained in nine of nine cells (Fig. 7B) in which we always confirmed the ability to activate the sponge K<sup>+</sup> channels by application of external AA (pH<sub>o</sub> 9.0, 215 mOsm kg<sup>-1</sup>) at the end of the experiment, as shown in Fig. 7A. In four additional cells (data not shown), we first reversibly activated AquK<sub>2P</sub> currents with external AA (pH<sub>o</sub> 9.0, 215 mOsm kg<sup>-1</sup>) and then applied the same osmotic challenges at pH<sub>o</sub> 7.4 and 9.0. Prior activation of AquK<sub>2P</sub> current by AA did not reveal a mechanosensitivity of the sponge K<sub>2P</sub> channels. To confirm that the brief osmotic challenges were sufficient to modify the activation of channels that are known to be mechanosensitive, we also tested oocytes expressing TREK-1 or

TRAAK (Patel et al., 1998; Maingret et al., 1999a; Maingret et al., 1999b; Bang et al., 2000; Lesage et al., 2000; Dedman et al., 2009) and observed activation of the mammalian K<sub>2P</sub> channels in hypoosmotic solutions and deactivation in hyperosmotic solutions (data not shown). Based on these results, we conclude that AquK<sub>2P</sub> harbors little or no mechanosensitivity.

AquK<sub>2P</sub> channels were not sensitive to temperature in the range of 14–32°C at pH 8.5 or 9.0. An example of the failure to activate AquK<sub>2P</sub> currents with cool or warm temperatures is shown in Fig. 7C; the same observations were made in four of four cells in which we always confirmed expression of the K<sup>+</sup> channels by activation with external AA at alkaline pH<sub>o</sub>. For comparison, elevating the temperature from 24°C to 32°C results in a fivefold increase in mammalian TREK-1, TREK-2 and TRAAK currents (Kang et al., 2005).

#### DISCUSSION

We completed a physiological study of a structurally distinct sponge K<sub>2P</sub> channel to learn about its mechanisms of activation and to compare it with other members of the K<sub>2P</sub> channel family. K<sub>2P</sub> channels are present throughout the animal kingdom, although we

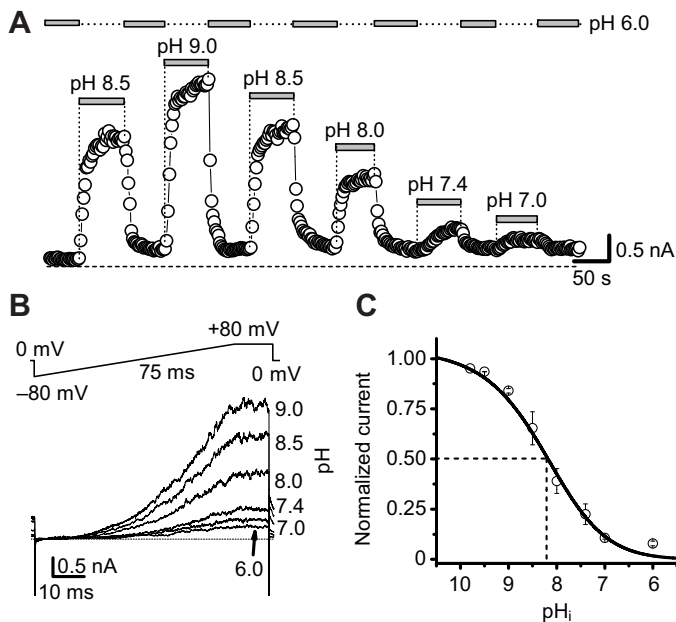

Fig. 5.  $AquK_{2P}$  channels are activated by internal alkalinization. (A) Representative time course of inside-out macropatch recordings from oocytes injected with  $AquK_{2P}$  RNA. Current amplitudes were measured at +80 mV using a 75 ms voltage ramp from –80 to +80 mV. The dashed line on the current time course indicates the zero current level. The horizontal bars at the top indicate the changes in internal pH ( $pH_i$ ) values. (B) Representative  $AquK_{2P}$  currents evoked by various  $pH_i$  values (6.0–9.0). Traces are averages from three runs. (C) A  $pH_i$  dose–response curve for normalized  $AquK_{2P}$  currents (means  $\pm$  s.e.m.,  $N=4-6$ ). Data were normalized to the maximum value obtained by fitting with the Hill equation for each patch. The solid line was fitted with the Hill equation  $I=1/[1+(pK_a/pH_i)^h]$ , where  $pK_a$  is the  $pH_i$  value at which the current was 50% inhibited and  $h$  is the Hill coefficient. The  $pK_a$  was determined to be  $8.18 \pm 0.05$  and  $h=0.75 \pm 0.06$ .

know very little about the functional properties of invertebrate and non-mammalian vertebrate channels. Outside the highly conserved TM1–TM4 domains and the two P regions (Fig. 1),  $AquK_{2P}$  is considerably different from any known  $K_{2P}$  channels and appears to be a distinct class, based on phylogenetic analysis (Fig. 2). The presence of a  $K_{2P}$  subunit in choanoflagellates (<http://genome.jgi-psf.org/Monbr1/Monbr1.home.html>; data not shown) suggests that these channels were present before the advent of multicellularity. Given the important role of  $K_{2P}$  channels in epithelia (Davis and Cowley, 2006) and the proposal that epithelial cells were the first specialized cells in the evolution of multicellularity (Adams et al., 2010; Fahey and Degnan, 2010), it is not surprising to find  $K_{2P}$  subunits represented in all animal phyla. Presently, functional expression of  $K_{2P}$  channels from non-mammalian species is lacking but could be useful in providing greater insight into the evolutionary relationships of these important ion channels.

Like many of the mammalian  $K_{2P}$  channels (Bayliss and Barrett, 2008; Enyedi and Czirják, 2010), the sponge channel likely plays a major role in setting the resting membrane potential in some poriferan cells. We found that  $AquK_{2P}$  channel activation has a requirement for internal alkaline pH or external alkaline pH plus AA, information that is biologically relevant because seawater has a pH of approximately 8.1 (Orr et al., 2005). Thus, the marine sponge's native environment provides an opportunity for basal activity of this potassium channel *in situ* and the coupling of changes

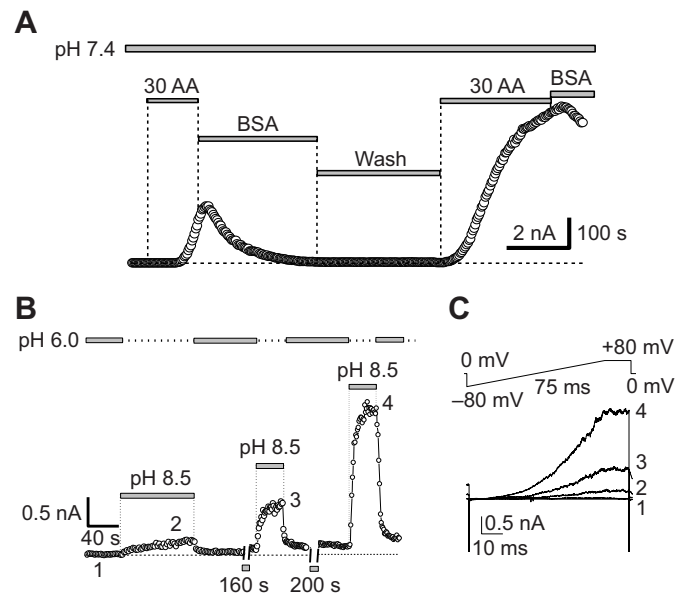

Fig. 6. Activation of  $AquK_{2P}$  by internal AA and sensitization of current activation. Representative time courses of inside-out macropatch recordings from oocytes injected with  $AquK_{2P}$ . Current amplitudes were measured at +80 mV using a 75 ms voltage ramp from –80 to +80 mV. Dashed line indicates the zero current level. (A) Demonstration of the activation of  $AquK_{2P}$  by two successive applications of AA ( $30 \mu\text{mol l}^{-1}$ ) to the internal side of the membrane patch. BSA ( $0.5 \text{ mg ml}^{-1}$ ) reversed the AA effect and the wash solution removed the BSA prior to the second application of AA. Horizontal bars above the current data indicate the internal pH value and the time of application of different solutions. (B) Representative time course from inside-out macropatch recordings using repeated applications of  $pH_i 8.5$ , all in the absence of AA. (C) Representative  $AquK_{2P}$  currents sampled at the time points noted in B (1–4) using the indicated ramp protocol with  $pH_i 6.0$  (trace 1; baseline) and three consecutive applications of  $pH_i 8.5$  (traces 2–4) to the same patch.

in the cellular membrane potential to small changes in pH and the presence of polyunsaturated fatty acids. Furthermore, the outwardly rectifying nature of the  $AquK_{2P}$  currents suggests a possible role in the repolarization of action potentials, which could provide a physiological link between  $pH_i$ , AA and the frequency of firing of calcium-dependent action potentials in sponges (Leys et al., 1999).

#### AA sensitivity of $AquK_{2P}$

The activation of  $AquK_{2P}$  by externally or internally applied AA (Figs 3, 4, 6) shows that the poriferan channel shares a functional feature unique to the TREK/TRAAK subfamily of  $K_{2P}$  channels (Fink et al., 1998; Enyedi and Czirják, 2010). Furthermore, the activity of  $AquK_{2P}$  does not require additional subunits, which differentiates it from  $K_{2P}5.1$  (Duprat et al., 2007) and the electrically silent members  $K_{2P}7.1$  (Salinas et al., 1999) and  $K_{2P}12.1$  (Rajan et al., 2001). Our results are also consistent with prior work that attributes the structural basis for AA activation of mammalian TREK/TRAAK channels to an internally facing region of the channel (Patel et al., 1998; Kim et al., 2001a; Kim et al., 2001b) because the time course of  $AquK_{2P}$  activation was faster when the lipid-soluble AA was applied directly to the internal face of the membrane (Fig. 6) than when it was applied outside the whole cell (Fig. 4). The concentration dependence of  $AquK_{2P}$  channel activation by AA, determined with external application of the fatty acid, showed an  $EC_{50}$  of  $\sim 30 \mu\text{mol l}^{-1}$  (Fig. 3C). The presence and concentration of endogenous AA in sponges is unknown, but free (non-esterified) AA

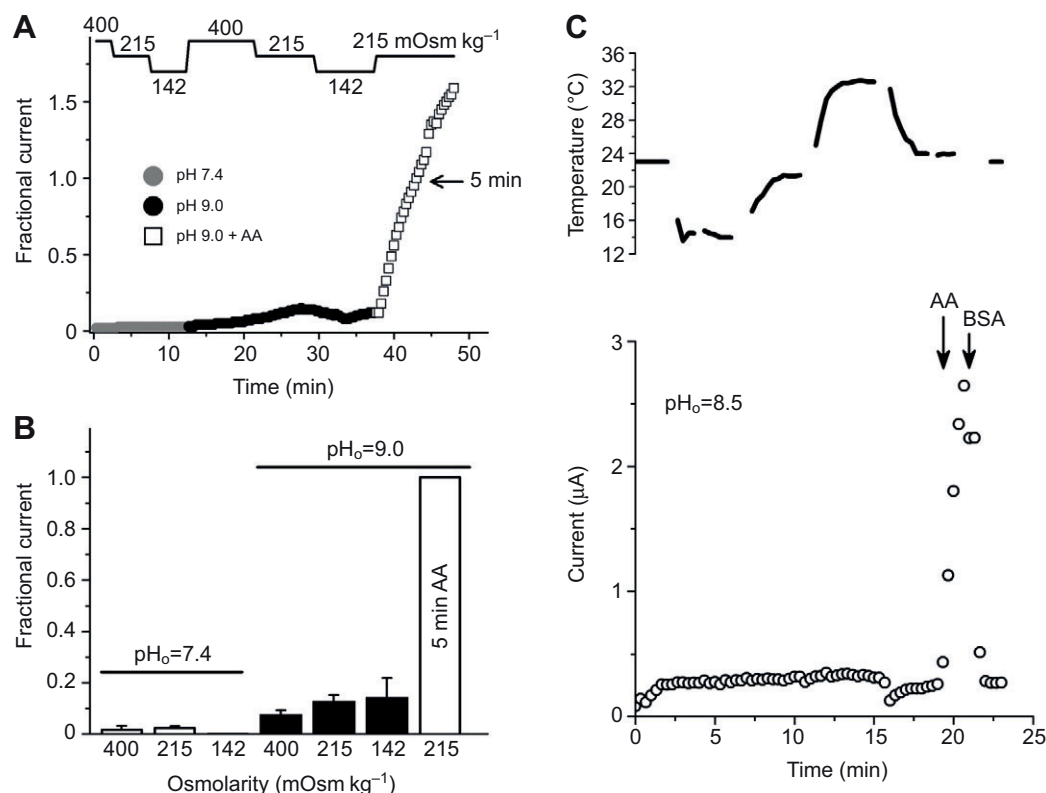

Fig. 7.  $AquK_{2P}$  is insensitive to osmotic and thermal stimuli. (A) In a representative cell, the  $AquK_{2P}$  outward current at +60 mV was measured and normalized to the current measured 5 min (arrow) after the application of  $30 \mu\text{mol l}^{-1}$  AA at  $\text{pH}_o 9.0$  at the end of the experiment. Applications of solutions at  $\text{pH}_o 7.4$  or  $9.0$  and of different osmolarity ( $142$ ,  $215$  and  $400 \text{ mOsm kg}^{-1}$ ) are noted on the plot. (B) Bar graph showing composite results (means  $\pm$  s.e.m.,  $N=9$ ) for the effects of osmotic stimuli at  $\text{pH}_o 7.4$  or  $9.0$  in recordings made as in A. (C) Top: temperature changes in the oocyte recording chamber measured during application of a  $2 \text{ mmol l}^{-1}$   $\text{K}^+$ ,  $\text{pH}_o 8.5$  external solution. Interruptions are times during which the temperature was not recorded. Bottom: the corresponding time dependence of the outward  $AquK_{2P}$   $\text{K}^+$  current measured at +50 mV; bath temperature and current are plotted on the same time scale. The arrows denote the brief application of AA ( $30 \mu\text{mol l}^{-1}$ ) or BSA to activate or reverse the activation of the  $AquK_{2P}$  channels, respectively.

in human tissues ranges from  $1$  to  $100 \mu\text{mol l}^{-1}$  as determined by mass spectrometry (Brash, 2001). Few examples of fitted  $\text{EC}_{50}$  values for AA activation of mammalian  $\text{K}_{2P}$  channels exist in the literature, but TREK-2 channels are reported to have an  $\text{EC}_{50}$  of  $7 \mu\text{mol l}^{-1}$  AA (Bang et al., 2000) and AA facilitates the constitutive activation of THIK-1 channels with an  $\text{EC}_{50}$  of  $1 \mu\text{mol l}^{-1}$  (Rajan et al., 2001). The extracellular AA concentrations used in the present study were necessary to activate the  $AquK_{2P}$  channels and are not unreasonable given the concentrations utilized in other cellular physiology experiments and that be available in biological tissues.

#### Activating stimuli are more limited for $AquK_{2P}$ than related $\text{K}_{2P}$ channels

Under the conditions tested, the AA-dependent activation of  $AquK_{2P}$  occurs in the absence of constitutive activation and without significant mechanosensitivity (Fig. 7A,B). We also found no substantial effects of temperature changes on  $AquK_{2P}$  current activation (Fig. 7C). Thus, compared with certain polymodal mammalian  $\text{K}_{2P}$  channels, particularly those stimulated by AA (Patel et al., 1998; Duprat et al., 2007; Lotshaw, 2007; Mathie et al., 2010), the mechanism of activation of  $AquK_{2P}$  is more restricted. The internally facing C termini of TREK/TRAAK channels are thought to provide both AA sensitivity and mechanosensitivity (Patel et al., 1998; Kim et al., 2001a; Kim et al., 2001b). Notably, the C-terminal region is structurally divergent among  $\text{K}_{2P}$  channels and  $AquK_{2P}$  has one of the shortest C termini (Fig. 1, from Q303 to E353). The identification in this paper of a  $\text{K}_{2P}$  channel that shows AA

sensitivity but little or no mechanosensitivity could provide useful comparisons for future studies on the unique structural determinants for these two types of stimuli.

#### Extracellular alkalization regulates AA-dependent activation of $AquK_{2P}$

Extracellular pH is a common regulator of mammalian  $\text{K}_{2P}$  channels (Bayliss and Barrett, 2008; Enyedi and Czirják, 2010). For example, extracellular acidification inhibits TREK-1 with a  $\text{pK}_a$  of  $7.35$ , inhibits TASK-3 with a  $\text{pK}_a$  of  $5.96$  (Rajan et al., 2000), and activates TREK-2 with a  $\text{pK}_a$  of  $7.3$  (Sandoz et al., 2009). Despite the differences in the  $\text{pK}_a$  values for proton inhibition or activation, each of these extracellular pH-regulated  $\text{K}_{2P}$  channel displays a resting  $\text{K}^+$  current at standard recording conditions of  $\text{pH}_o 7.4$ . Because we never observed constitutive activity of  $AquK_{2P}$  at  $\text{pH}_o 7.4$  and the sponge channel current was only rarely activated by AA at  $\text{pH}_o 7.4$ , the effect of  $\text{pH}_o$  on  $AquK_{2P}$  can be described as alkaline regulation of channel activation by AA. Although TASK-2 (Morton et al., 2003; Zúñiga et al., 2011) and TALK channels (Bayliss and Barrett, 2008) are also activated by external alkalization, they do not require a polyunsaturated fatty acid, which differs from the mechanism of  $\text{pH}_o$  regulation of  $AquK_{2P}$  (Fig. 3). The  $\text{pK}_a$  for external pH regulation of AA-dependent activation of  $AquK_{2P}$  is undetermined because of the sensitization to repeated activation of the channels. However, our data suggest that the midpoint of the  $\text{pH}_o$  sensitivity of the lipid activation is likely to be greater than  $8.0$ . For example, we always observed activation by



AA when pH<sub>o</sub> was raised to 8.5, but AA-activated currents at pH<sub>o</sub> 8.0 were very small unless tested after an initial sensitizing stimulus. The sponge K<sub>2P</sub> channel would exist in a favorable environment of ~pH 8.1 in seawater (Orr et al., 2005), in which small changes in pH<sub>o</sub> could dynamically regulate channel opening by AA.

Sensitization of the activation of AquK<sub>2P</sub> by AA in alkaline solutions was prominent in TEVC recordings (Fig. 4) and was present in excised patch recordings in which AA was applied rapidly and directly to the internal side of the membrane (Fig. 6A). Repeated applications of alkaline pH (Fig. 6B) to the inside surface of a membrane patch also induced a sensitized response, although current amplitudes in the macropatch recordings tended to reach a stable amplitude over time (often 5–30 min). Because sensitization eventually stabilized following inside-out patch excision, cytoplasmic agents or cytoskeletal elements that are lost upon excision may contribute to this phenomenon. However, the molecular mechanism for the sensitization is not yet defined.

#### Intracellular alkalization and AA are activators of AquK<sub>2P</sub>

AquK<sub>2P</sub> currents are activated by alkaline internal pH with a pK<sub>a</sub> of 8.18 (Fig. 5). The sensitivity to internal pH was measured with an external pH of 7.4, which is non-activating for AquK<sub>2P</sub>. Under these conditions, internal alkalization is sufficient to open the channels and AA is not required. Mammalian TREK/TRAAK channels are also regulated by internal pH. Internal alkalization stimulates TRAAK whereas acidification stimulates TREK-1 and TREK-2 (Maingret et al., 1999b; Kim et al., 2001a; Honoré et al., 2002). However, whereas TREK and TRAAK channels demonstrate constitutive activity in whole oocytes studied by TEVC at pH<sub>o</sub> 7.4, AquK<sub>2P</sub> currents were negligible under the same conditions and less than 5% of the cells showed AA-dependent current activation at pH<sub>o</sub> 7.4. The heterogeneity of cytosolic pH in intact oocytes and the internal pH sensitivity of AquK<sub>2P</sub> may explain these observations. Collagenase-treated *Xenopus* oocytes were shown to have a resting cytosolic pH range of 7.06–7.93, with an average pH of 7.43 (Cicirelli et al., 1983). At an average internal pH of 7.4, we would expect 25% of the maximum current activation based on our inside-out patch clamp recordings (Fig. 5C). Thus, we hypothesize that most of the intact oocytes tested in the TEVC recordings in this study had a resting cytosolic pH less than 7.4, which was insufficient to reveal constitutive channel activation. Further investigation will be needed to determine the mechanisms by which internal alkalization and AA gate the AquK<sub>2P</sub> channel.

#### Conclusions

The marine sponge AquK<sub>2P</sub> channel is AA activated and pH sensitive, properties that are shared by certain mammalian K<sub>2P</sub> channels and highlight the conservation of basic gating mechanisms for animal K<sub>2P</sub> channels. A requirement for AquK<sub>2P</sub> activation by internal alkalization or the modulatory effects of external alkalization is also biologically relevant because seawater has a pH of ~8.1. Thus, the native environment of the marine sponge may provide an opportunity for basal activity of this potassium channel *in situ* and the coupling of small changes in pH and the presence of polyunsaturated fatty acids to regulation of the cellular membrane potential and action potential repolarization. Finally, AA-dependent channel activation without osmotically induced activation makes AquK<sub>2P</sub> unique among K<sub>2P</sub> channels and provides an opportunity for the future determination of the structural regions of the channel that are necessary for AA sensitivity in the absence of mechanosensitivity.

#### LIST OF ABBREVIATIONS

|                    |                                                         |
|--------------------|---------------------------------------------------------|
| AquK <sub>2P</sub> | <i>Amphimedon queenslandica</i> K <sub>2P</sub> channel |
| AA                 | arachidonic acid                                        |
| BSA                | bovine serum albumin                                    |
| K <sub>2P</sub>    | tandem pore domain potassium channel                    |
| MES                | methanesulfonate                                        |
| pH <sub>i</sub>    | internal/intracellular pH                               |
| pH <sub>o</sub>    | external/extracellular pH                               |
| TEVC               | two-electrode voltage clamp                             |

#### ACKNOWLEDGEMENTS

We thank Doug Bayliss for the gifts of TREK and TRAAK channel cDNAs, Bernard Degnan for supplying larvae from *Amphimedon queenslandica*, and April Hill for advice on searching the *Amphimedon* genome. Thanks to Onur Sakarya and Ken Kosik for help with primer design for cloning, undergraduates in the Boland laboratory for help with RNA and oocyte preparations, and Heikki Vaananen and Sophia Gruszecki for oocyte preparation in the Logothetis laboratory.

#### FUNDING

This research was supported by the National Institutes of Health [GM096142 to L.M.B.; R01 HL59949 to D.E.L.], a Mednick Memorial Grant Fellowship [to L.M.B.], an undergraduate fellowship from the Howard Hughes Medical Institute [to G.W.], the University of Richmond Dickinson Award in Biology [to R.H.], and an Natural Sciences and Engineering Research Council of Canada Discovery grant [to S.P.L.]. Deposited in PMC for release after 6 months.

#### REFERENCES

- Adams, E. D. M., Goss, G. G. and Leys, S. P. (2010). Freshwater sponges have functional, sealing epithelia with high transepithelial resistance and negative transepithelial potential. *PLoS ONE* **5**, e15040.
- Bang, H., Kim, Y. and Kim, D. (2000). TREK-2, a new member of the mechanosensitive tandem-pore K<sup>+</sup> channel family. *J. Biol. Chem.* **275**, 17412–17419.
- Bayliss, D. A. and Barrett, P. Q. (2008). Emerging roles for two-pore-domain potassium channels and their potential therapeutic impact. *Trends Pharmacol. Sci.* **29**, 566–575.
- Boland, L. M., Drzewiecki, M. M., Timoney, G. and Casey, E. (2009). Inhibitory effects of polyunsaturated fatty acids on Kv4/KChIP potassium channels. *Am. J. Physiol. Cell Physiol.* **296**, C1003–C1014.
- Brash, A. R. (2001). Arachidonic acid as a bioactive molecule. *J. Clin. Invest.* **107**, 1339–1345.
- Carpaneto, A., Magrassi, R., Zocchi, E., Cerrano, C. and Usai, C. (2003). Patch-clamp recordings in isolated sponge cells (*Axinella polypoides*). *J. Biochem. Biophys. Methods* **55**, 179–189.
- Cicirelli, M. F., Robinson, K. R. and Smith, L. D. (1983). Internal pH of *Xenopus* oocytes: a study of the mechanism and role of pH changes during meiotic maturation. *Dev. Biol.* **100**, 133–146.
- Davis, K. A. and Cowley, E. A. (2006). Two-pore-domain potassium channels support anion secretion from human airway Calu-3 epithelial cells. *Pflügers Arch.* **451**, 631–641.
- Dedman, A., Sharif-Naeini, R., Folgering, J. H. A., Duprat, F., Patel, A. and Honoré, E. (2009). The mechano-gated K<sub>2P</sub> channel TREK-1. *Eur. Biophys. J.* **38**, 293–303.
- Duprat, F., Lauritzen, I., Patel, A. and Honoré, E. (2007). The TASK background K<sub>2P</sub> channels: chemo- and nutrient sensors. *Trends Neurosci.* **30**, 573–580.
- Elliott, G. R. and Leys, S. P. (2007). Coordinated contractions effectively expel water from the aquiferous system of a freshwater sponge. *J. Exp. Biol.* **210**, 3736–3748.
- Enyedi, P. and Cziráj, G. (2010). Molecular background of leak K<sup>+</sup> currents: two-pore domain potassium channels. *Physiol. Rev.* **90**, 559–605.
- Fahey, B. and Degnan, B. M. (2010). Origin of animal epithelia: insights from the sponge genome. *Evol. Dev.* **12**, 601–617.
- Fink, M., Lesage, F., Duprat, F., Heurteaux, C., Reyes, R., Fosset, M. and Lazdunski, M. (1998). A neuronal two P domain K<sup>+</sup> channel stimulated by arachidonic acid and polyunsaturated fatty acids. *EMBO J.* **17**, 3297–3308.
- Honoré, E., Maingret, F., Lazdunski, M. and Patel, A. J. (2002). An intracellular proton sensor commands lipid- and mechano-gating of the K<sup>+</sup> channel TREK-1. *EMBO J.* **21**, 2968–2976.
- Hooper, J. N. A. and Van Soest, R. W. M. (2006). A new species of *Amphimedon* (Porifera, Demospongiae, Haplosclerida, Niphatidae) from the Capricorn-Bunker Group of Islands, Great Barrier Reef, Australia: target species for the 'sponge genome project'. *Zootaxa* **1314**, 31–39.
- Jones, D. T., Taylor, W. R. and Thornton, J. M. (1992). The rapid generation of mutation data matrices from protein sequences. *Comput. Appl. Biosci.* **8**, 275–282.
- Kang, D., Choe, C. and Kim, D. (2005). Thermosensitivity of the two-pore domain K<sup>+</sup> channels TREK-2 and TRAAK. *J. Physiol.* **564**, 103–116.
- Kim, Y., Bang, H., Gnatenco, C. and Kim, D. (2001a). Synergistic interaction and the role of C-terminus in the activation of TRAAK K<sup>+</sup> channels by pressure, free fatty acids and alkali. *Pflügers Arch.* **442**, 64–72.
- Kim, Y., Gnatenco, C., Bang, H. and Kim, D. (2001b). Localization of TREK-2 K<sup>+</sup> channel domains that regulate channel kinetics and sensitivity to pressure, fatty acids and pH. *Pflügers Arch.* **442**, 952–960.
- Lesage, F., Guillemare, E., Fink, M., Duprat, F., Lazdunski, M., Romey, G. and Barhanin, J. (1996). TWIK-1, a ubiquitous human weakly inward rectifying K<sup>+</sup> channel with a novel structure. *EMBO J.* **15**, 1004–1011.

- Lesage, F., Maingret, F. and Lazdunski, M.** (2000). Cloning and expression of human TRAAK, a polyunsaturated fatty acids-activated and mechano-sensitive K<sup>+</sup> channel. *FEBS Lett.* **471**, 137-140.
- Leys, S. P., Mackie, G. O. and Meech, R. W.** (1999). Impulse conduction in a sponge. *J. Exp. Biol.* **202**, 1139-1150.
- Lotshaw, D. P.** (2007). Biophysical, pharmacological, and functional characteristics of cloned and native mammalian two-pore domain K<sup>+</sup> channels. *Cell Biochem. Biophys.* **47**, 209-256.
- Maingret, F., Fosset, M., Lesage, F., Lazdunski, M. and Honoré, E.** (1999a). TRAAK is a mammalian neuronal mechano-gated K<sup>+</sup> channel. *J. Biol. Chem.* **274**, 1381-1387.
- Maingret, F., Patel, A. J., Lesage, F., Lazdunski, M. and Honoré, E.** (1999b). Mechano- or acid stimulation, two interactive modes of activation of the TREK-1 potassium channel. *J. Biol. Chem.* **274**, 26691-26696.
- Mathie, A., Al-Moubarak, E. and Veale, E. L.** (2010). Gating of two pore domain potassium channels. *J. Physiol.* **588**, 3149-3156.
- Morton, M. J., O'Connell, A. D., Sivaprasadarao, A. and Hunter, M.** (2003). Determinants of pH sensing in the two-pore domain K<sup>+</sup> channels TASK-1 and -2. *Pflugers Arch.* **445**, 577-583.
- Nickel, M.** (2004). Kinetics and rhythm of body contractions in the sponge *Tethya wilhelma* (Porifera: Demospongiae). *J. Exp. Biol.* **207**, 4515-4524.
- Niemeyer, M. I., González-Nilo, F. D., Zúñiga, L., González, W., Cid, L. P. and Sepúlveda, F. V.** (2007). Neutralization of a single arginine residue gates open a two-pore domain, alkali-activated K<sup>+</sup> channel. *Proc. Natl. Acad. Sci. USA* **104**, 666-671.
- Niemeyer, M. I., Cid, L. P., Peña-Münzenmayer, G. and Sepúlveda, F. V.** (2010). Separate gating mechanisms mediate the regulation of K2P potassium channel TASK-2 by intra- and extracellular pH. *J. Biol. Chem.* **285**, 16467-16475.
- Nowak, L., Bregestovski, P., Ascher, P., Herbet, A. and Prochiantz, A.** (1984). Magnesium gates glutamate-activated channels in mouse central neurones. *Nature* **307**, 462-465.
- Orr, J. C., Fabry, V. J., Aumont, O., Bopp, L., Doney, S. C., Feely, R. A., Gnanadesikan, A., Gruber, N., Ishida, A., Joos, F. et al.** (2005). Anthropogenic ocean acidification over the twenty-first century and its impact on calcifying organisms. *Nature* **437**, 681-686.
- Patel, A. J., Honoré, E., Maingret, F., Lesage, F., Fink, M., Duprat, F. and Lazdunski, M.** (1998). A mammalian two pore domain mechano-gated S-like K<sup>+</sup> channel. *EMBO J.* **17**, 4283-4290.
- Penner, R. and Fleig, A.** (2007). The Mg<sup>2+</sup> and Mg<sup>2+</sup>-nucleotide-regulated channel-kinase TRPM7. *Handb. Exp. Pharmacol.* **179**, 313-328.
- Philippe, H., Derelle, R., Lopez, P., Pick, K., Borchellini, C., Boury-Esnault, N., Vacelet, J., Renard, E., Houliston, E., Quéinnec, E. et al.** (2009). Phylogenomics revives traditional views on deep animal relationships. *Curr. Biol.* **19**, 706-712.
- Rajan, S., Wischmeyer, E., Liu, G. X., Preisig-Müller, R., Daut, J., Karschin, A. and Derst, C.** (2000). TASK-3, a novel tandem pore-domain acid-sensitive K<sup>+</sup> channel: an extracellular histidine as pH sensor. *J. Biol. Chem.* **275**, 16650-16657.
- Rajan, S., Wischmeyer, E., Karschin, C., Preisig-Müller, R., Grzeschik, K. H., Daut, J., Karschin, A. and Derst, C.** (2001). THIK-1 and THIK-2, a novel subfamily of tandem pore domain K<sup>+</sup> channels. *J. Biol. Chem.* **276**, 7302-7311.
- Salinas, M., Reyes, R., Lesage, F., Fosset, M., Heurteaux, C., Romey, G. and Lazdunski, M.** (1999). Cloning of a new mouse two-P domain channel subunit and a human homologue with a unique pore structure. *J. Biol. Chem.* **274**, 11751-11760.
- Sandoz, G., Douguet, D., Chatelain, F., Lazdunski, M. and Lesage, F.** (2009). Extracellular acidification exerts opposite actions on TREK1 and TREK2 potassium channels via a single conserved histidine residue. *Proc. Natl. Acad. Sci. USA* **106**, 14628-14633.
- Srivastava, M., Simakov, O., Chapman, J., Fahey, B., Gauthier, M. E. A., Mitros, T., Richards, G. S., Conaco, C., Dacre, M., Hellsten, U. et al.** (2010). The *Amphimedon queenslandica* genome and the evolution of animal complexity. *Nature* **466**, 720-726.
- Tamura, K., Peterson, D., Peterson, N., Stecher, G., Nei, M. and Kumar, S.** (2011). MEGA5: molecular evolutionary genetics analysis using maximum likelihood, evolutionary distance, and maximum parsimony methods. *Mol. Biol. Evol.* **28**, 2731-2739.
- Tompkins-MacDonald, G. J., Gallin, W. J., Sakarya, O., Degnan, B., Leys, S. P. and Boland, L. M.** (2009). Expression of a poriferan potassium channel: insights into the evolution of ion channels in metazoans. *J. Exp. Biol.* **212**, 761-767.
- Zocchi, E., Carpaneto, A., Cerrano, C., Bavestrello, G., Giovine, M., Bruzzone, S., Guida, L., Franco, L. and Usai, C.** (2001). The temperature-signaling cascade in sponges involves a heat-gated cation channel, abscisic acid, and cyclic ADP-ribose. *Proc. Natl. Acad. Sci. USA* **98**, 14859-14864.
- Zúñiga, L., Márquez, V., González-Nilo, F. D., Chipot, C., Cid, L. P., Sepúlveda, F. V. and Niemeyer, M. I.** (2011). Gating of a pH-sensitive K<sub>2P</sub> potassium channel by an electrostatic effect of basic sensor residues on the selectivity filter. *PLoS ONE* **6**, e16141.
